# Supplementary material for: Atmospheric pressure chemical vapor deposition of methylammonium bismuth iodide thin films
Source: Royal Society of Chemistry journal article supplement (doi:10.1039/c7ta06578g), 2017-01-01
Supplement: c7ta06578g1.pdf [file c7ta06578g1.pdf]

## Supporting Information

### Atmospheric pressure chemical vapor deposition of methylammonium bismuth iodide perovskites

*Xiao Chen<sup>1</sup>, Yoon Myung<sup>1,2</sup>, Arashdeep Thind<sup>3</sup>, Zhengning Gao<sup>3</sup>, Bo Yin<sup>3</sup>, Sung  
Beom Cho<sup>1</sup>, Peifu Cheng<sup>1</sup>, Bryce Sadtler<sup>3,4</sup>, Rohan Mishra<sup>1,3</sup>, Parag Banerjee<sup>1,3</sup>*

<sup>1</sup>Department of Mechanical Engineering and Materials Science, Washington University in St.  
Louis, St. Louis, MO – 63130, USA

<sup>2</sup>Department of Nanotechnology and Advanced Materials Engineering, Sejong University, Seoul,  
05006, Korea

<sup>3</sup>Institute of Materials Science & Engineering, Washington University in St. Louis, St. Louis,  
MO – 63130, USA

<sup>4</sup>Department of Chemistry, Washington University in St. Louis, St. Louis, MO – 63130, USA

## Supporting Information S1: X-ray diffraction of MAI powder

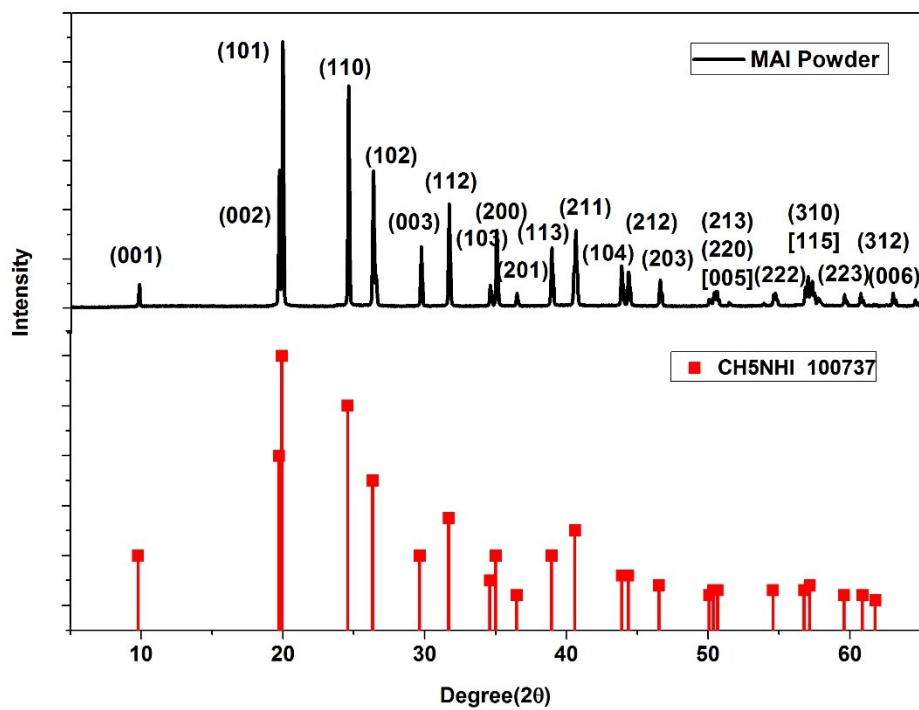

Figure S 1: XRD of MAI powder (black) with corresponding JCPDS file # 100737 in red below.

## Supporting Information S2: Calculation of vapor pressure for BiI<sub>3</sub> and ratio of MAI and BiI<sub>3</sub> vapor pressures at point of sublimation and condensation

Thermogravimetric analysis (TGA) is used to determine the mass loss behavior of the methyl ammonium iodide (MAI) and bismuth iodide (BiI<sub>3</sub>) powders. These are the constituents that make up the perovskite, (CH<sub>3</sub>NH<sub>3</sub>)<sub>3</sub>Bi<sub>2</sub>I<sub>9</sub>. TGA was performed using Q5000 IR (TA Instruments), heating at a steady heating rate (typically between 2.5 and 10 °C min<sup>-1</sup>) under a constant 20 mL min<sup>-1</sup> N<sub>2</sub> gas flow. The investigated temperature intervals were between a minimum of 25 °C to a maximum of 800 °C. Ceramic crucibles and approximately 5–15 mg of sample material were employed for each measurement. The approach presented here is adapted from Dualeh et al.,<sup>1</sup> and the data for MAI is directly obtained from their analysis. The data for BiI<sub>3</sub> is obtained from our experiments, as described below.

The Clausius-Clapeyron relation relates the vapor pressure  $p$  and the temperature  $T$  of a solid with its enthalpy of sublimation  $\Delta H_{sub}$ , where  $R$  is the gas constant (8.314JK<sup>-1</sup>mol<sup>-1</sup>) according to equation S1<sup>2</sup>

$$\frac{d \ln p}{dt} = \frac{\Delta H_{sub}}{RT^2} \quad [\text{eq. S1}]$$

The first derivative of the TGA heat curve gives a direct measure of the instantaneous rate of mass loss  $m_{sub}$  at temperature  $T$ ,

$$\frac{dm}{dt} = \frac{\Delta m}{\Delta t} = m_{sub} \quad [\text{eq. S2}]$$

In equilibrium conditions, the rates of vapor condensation and evaporation are assumed to be equal. Hence the rate of mass loss by sublimation  $m_{sub}$  can be related to the vapor pressure by equation S3 according to Langmuir<sup>3</sup> where  $A$  is the exposed sublimation surface area (here we

take the area calculated from the TGA sample pan during the measurement) and  $M_w$  is the molecular mass of the material.

$$p = \frac{1}{A} \left( \frac{2\pi RT}{M_w} \right)^{\frac{1}{2}} m_{sub} \quad [\text{eq. S3}]$$

Integrating equation S1 yields equation S4, which allows the determination of  $\Delta H_{sub}$ , and sublimation temperature  $T_{sub}$  from the slope and x-intercept of the plot of  $\ln p$  vs.  $1/T$ , respectively:

$$\ln p = -\frac{\Delta H_{sub}}{R} \left( \frac{1}{T} - \frac{1}{T_{sub}} \right) \quad [\text{eq. S4}]$$

Based on this approach, **Figure S2a** shows the weight loss of  $\text{BiI}_3$  powder as a function of heating rate. The corresponding rate of weight loss ( $dm/dt$ ) is shown in **Figure S2b**. Therefore, using equation S3, it is possible to calculate  $p$ , the vapor pressure for  $\text{BiI}_3$ . This is plotted as a semi-log plot as a function of  $1/T$  in **Figure S2c**. As a result, the vapor pressure of  $\text{BiI}_3$  can be calculated from equation S4. This is shown in **Figure S2d**. As stated previously, the vapor pressure of MAI is obtained from Dualeh et al. <sup>1</sup> Next, using the known temperature profile of the furnace, it is possible to calculate the partial vapor pressures of MAI,  $\text{BiI}_3$  at the point of sublimation and at the point of condensation (i.e. at the substrate).

It can be seen that the MAI vapor pressure is 4.7x of vapor pressure of  $\text{BiI}_3$  as both the precursors sublime inside the furnace, but at different temperatures (199 °C for MAI and 230 °C for  $\text{BiI}_3$ ). Since the molecules travel downstream to the cooler zone, condensation occurs. At the point of deposition, the temperature on the substrate = 160 °C. Here, MAI remains more volatile and the ratio of the equilibrium vapor pressure of MAI :  $\text{BiI}_3$  = 87. Further, the driving force for condensation is proportional to  $\ln (p_{sublimation}/p_{condensation})$  which for MAI = 2.01 and for  $\text{BiI}_3$  = 4.93. This implies that, compared to MAI,  $\text{BiI}_3$  readily deposits on the substrate whereas,

MAI infiltrates the  $\text{BiI}_3$  crystals via gas phase adsorption, followed by a solid-state reaction to form  $\text{MA}_3\text{Bi}_2\text{I}_9$ . This conclusion is in line with the observations via SEM, XRD and XPS.

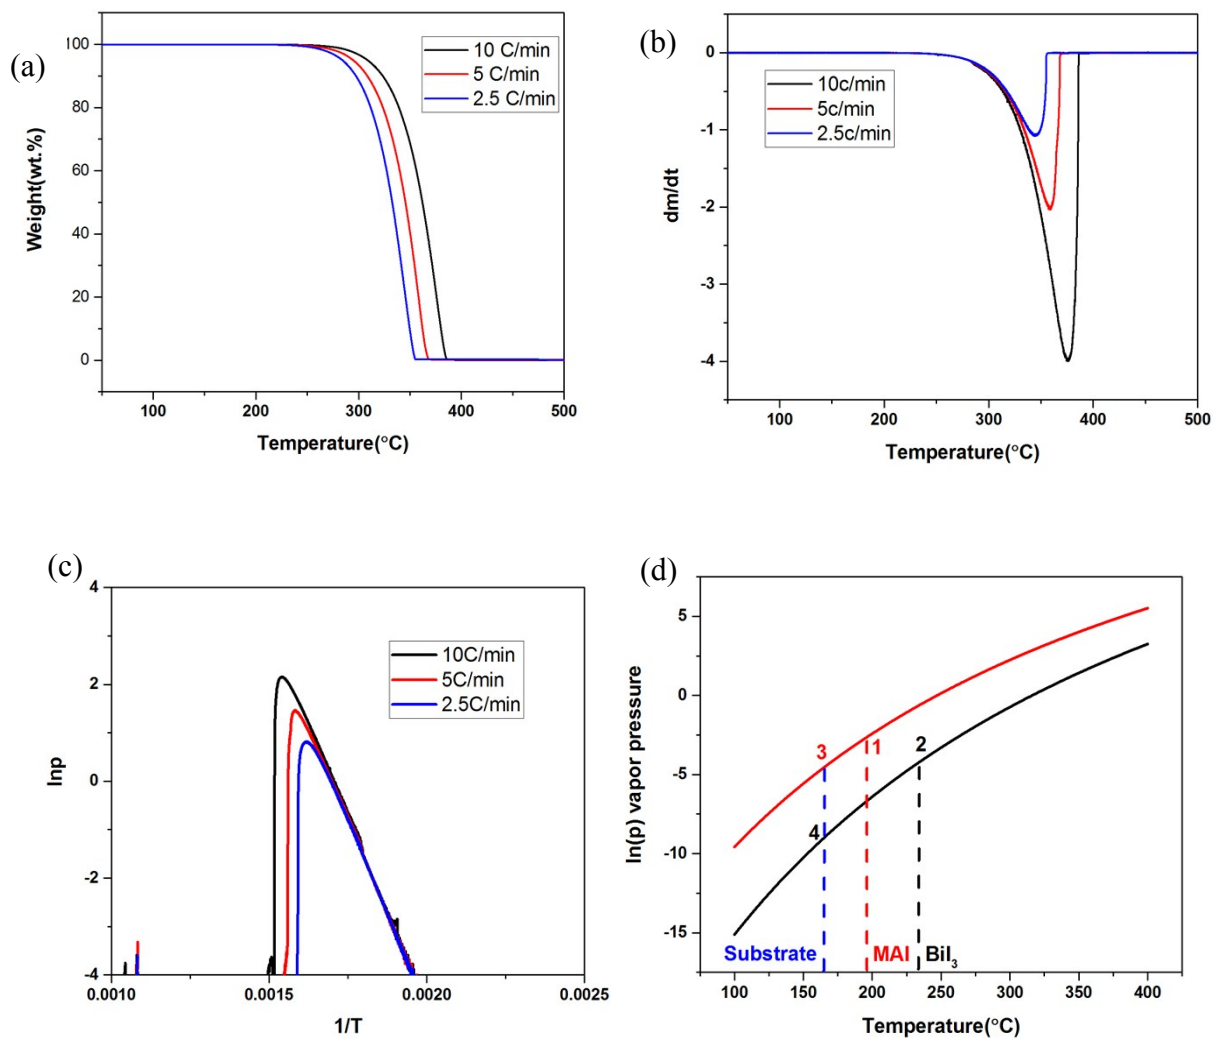

Figure S 2: (a) TGA heating curves of the  $\text{BiI}_3$  precursor and (b) corresponding 1<sup>st</sup> derivatives measured at different heating rates of  $\text{BiI}_3$  precursor; (c) calculated  $\ln p$  vis  $1/t$  of  $\text{BiI}_3$  precursor. (d) vapor pressure of  $\text{BiI}_3$  (black) and MAI (red) precursors as a function of temperature. The dotted vertical lines indicate the position where the MAI crucible (199  $^{\circ}\text{C}$ ),  $\text{BiI}_3$  crucible (230  $^{\circ}\text{C}$ ) and substrate (160  $^{\circ}\text{C}$ ) are placed in the horizontal tube furnace.

| <b>Precursor</b>                     | $\Delta H_{\text{sub}}$<br><b>(kJ/mol)</b> | $T_{\text{sub}}$<br><b>(°C)</b> |
|--------------------------------------|--------------------------------------------|---------------------------------|
| BiI <sub>3</sub><br>(this work)      | 128 ± 2                                    | 316 ± 2                         |
| MAI<br>(Dualeh et al. <sup>1</sup> ) | 105 ± 5                                    | 247 ± 26                        |

*Table S 1: The enthalpy of sublimation ( $\Delta H_{\text{sub}}$ ) and sublimation temperature ( $T_{\text{sub}}$ ) are shown for both the precursors – BiI<sub>3</sub> and MAI. The data from BiI<sub>3</sub> is obtained from this work, whereas the data for MAI is obtained from the work by Dualeh et al.<sup>1</sup>*

Supporting Information S3: Raman of BiI<sub>3</sub> film

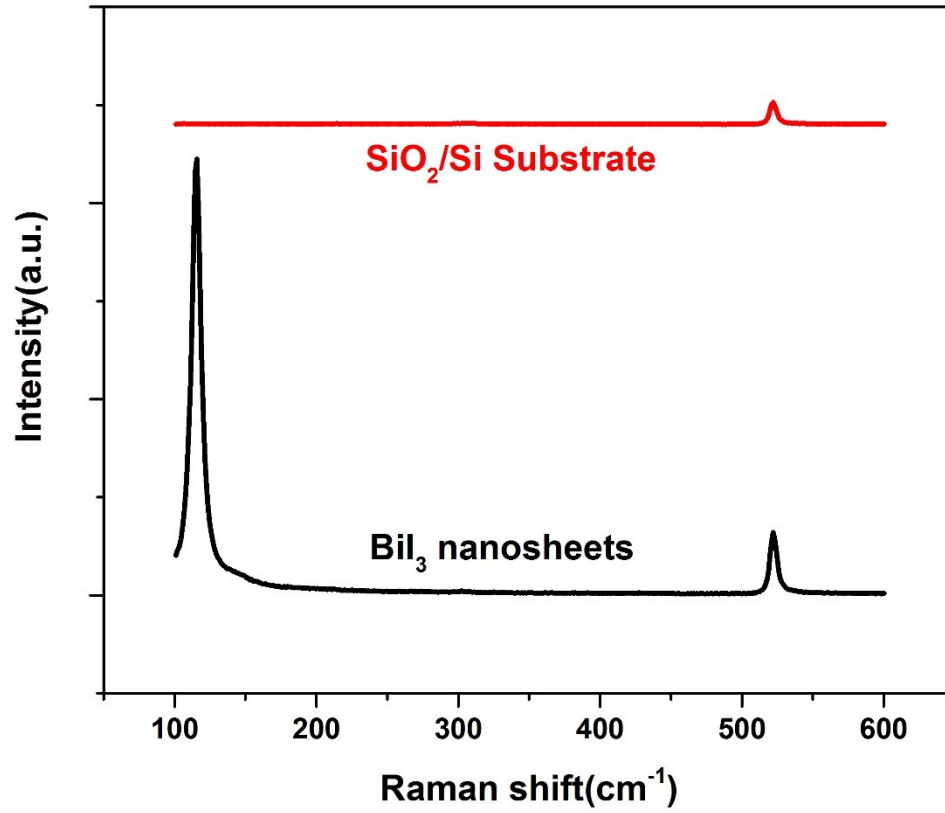

Figure S 3: Raman spectra of BiI<sub>3</sub> nanosheets. The Raman signal from SiO<sub>2</sub>/Si substrate on which the BiI<sub>3</sub> were deposited are shown for comparison.

### Supporting Information S4: XPS survey spectra of MA<sub>3</sub>Bi<sub>2</sub>I<sub>9</sub> film

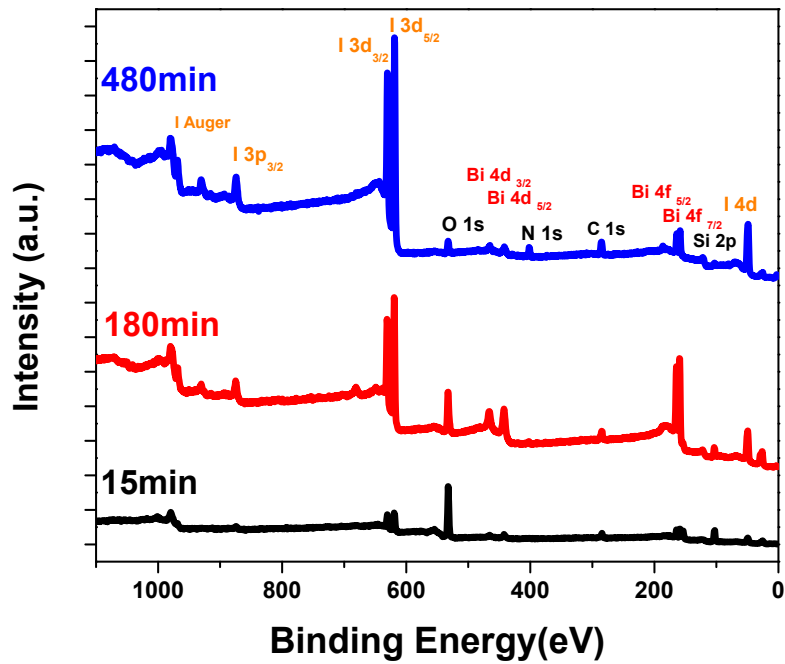

Figure S 4: XPS survey spectrum of the MA<sub>3</sub>Bi<sub>2</sub>I<sub>9</sub> film deposited for 15, 180 and 480 minutes, showing Bi, I, C and N peaks.



Supporting Information S5: UV-vis spectra of  $MA_3Bi_2I_9$  films of various thickness

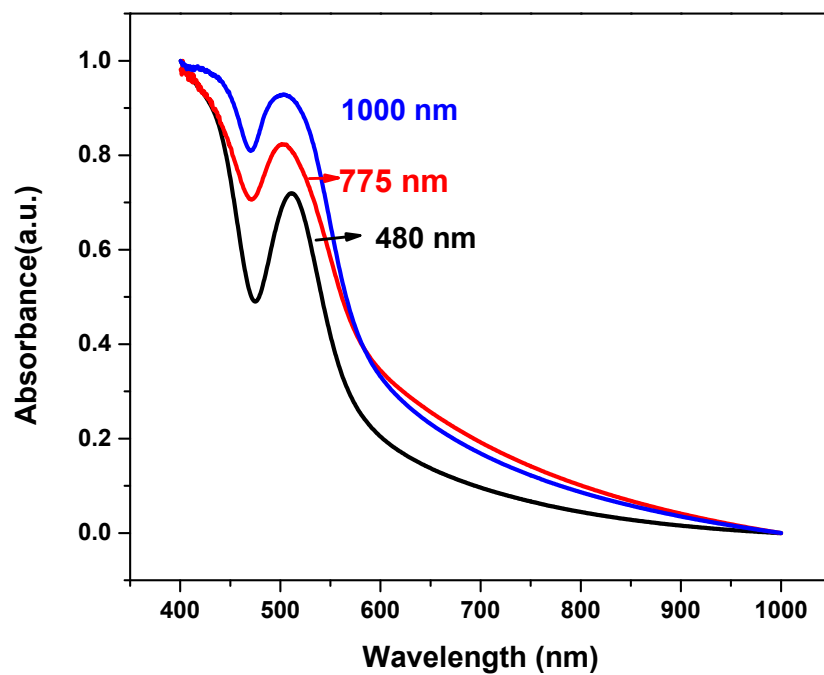

Figure S 5 : Normalized UV-vis spectra of various thickness  $MA_3Bi_2I_9$  films

### Supporting Information S6: Band structure using the HSE06 functional

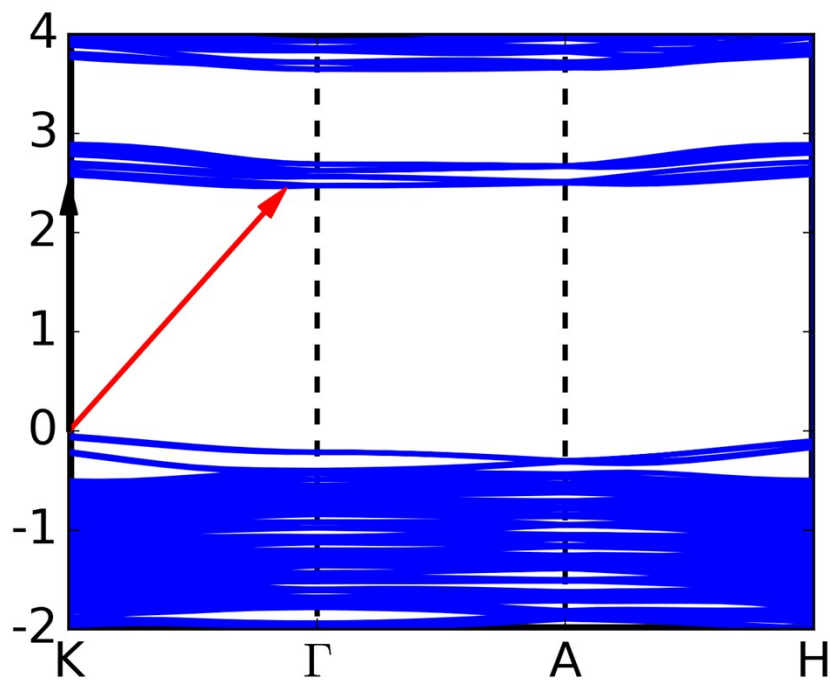

Figure S 6: Band structure for  $MA_3Bi_2I_9$ , using Heyd-Scuesria-Ernzerhof (HSE06) functional with spin-orbit coupling effects (SOC). The red arrow and black arrows show the indirect (2.41 eV) and direct (2.53 eV) band transitions respectively.

**Supporting Information S7: SEM cross-section of MA<sub>3</sub>Bi<sub>2</sub>I<sub>9</sub> film**

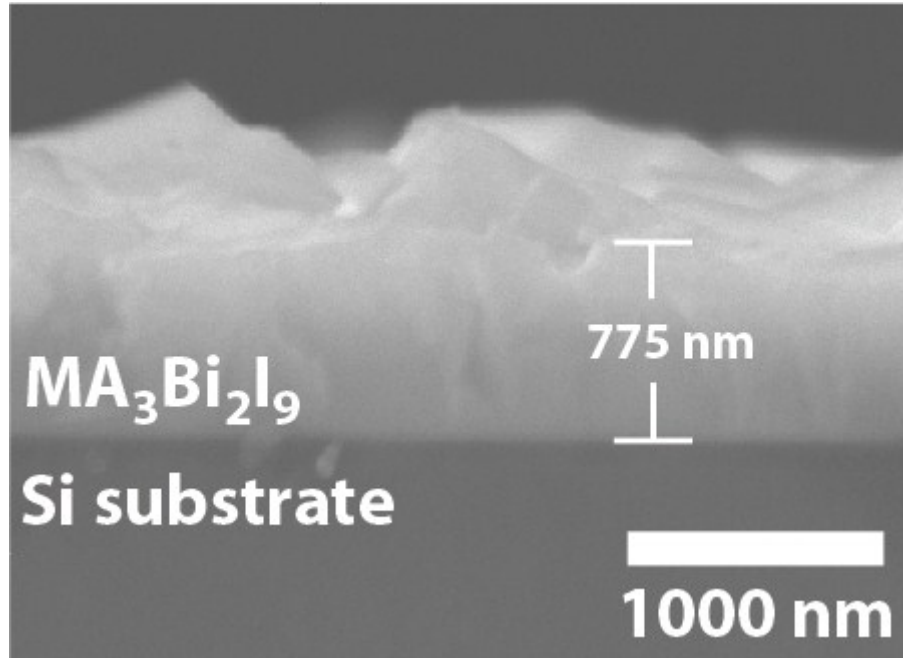

*Figure S 7: Cross-section SEM image of MA<sub>3</sub>Bi<sub>2</sub>I<sub>9</sub> film. The thickness is determined to be 775 nm and is used in the Hall measurement calculations.*

Supporting Information S7: XPS fine spectra of O 1s and Bi for fresh and 14 day exposed MA<sub>3</sub>Bi<sub>2</sub>I<sub>9</sub> film

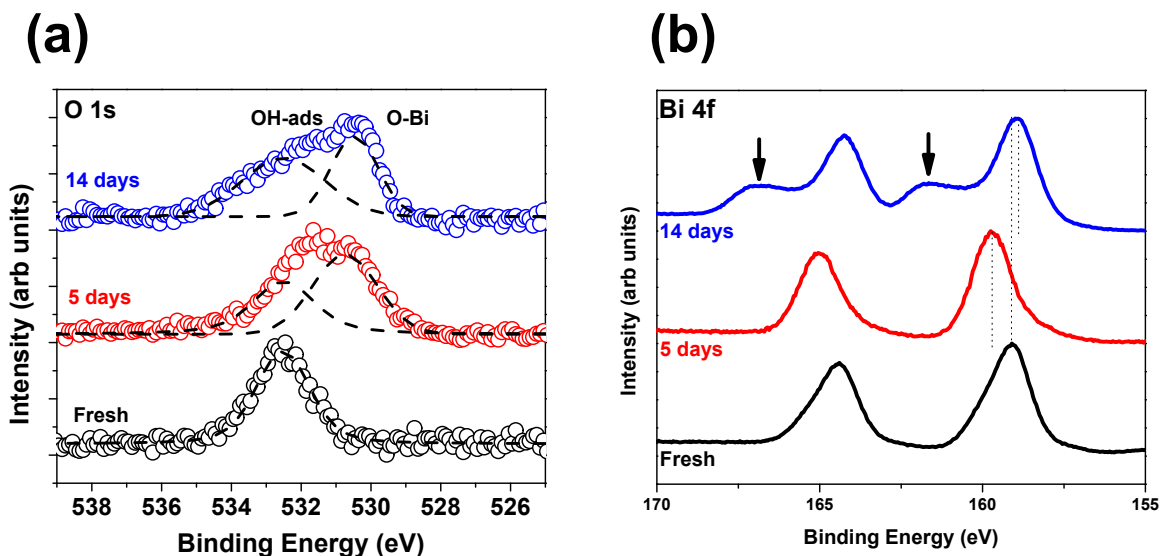

Figure S 8: (a) XPS fine spectra of O 1s for fresh (black) and after 5 (red), 14 days (blue) in ambient (red). The fresh samples show O 1s peak at 532.5 eV corresponding to hydroxyl groups adsorbed on the surface of the (MA)<sub>3</sub>Bi<sub>2</sub>I<sub>9</sub>. After 5 days, a shoulder emerges on the lower binding energy (530.4 eV) side which indicates lattice bonded oxygen with Bi which progressively grows stronger after 14 days.<sup>4</sup> Notice the OH peak broadens as well, signifying surface hydration. (b) XPS fine spectra of Bi 4f for fresh (black) and after 5 (red) and 14 days (blue) in ambient. The Bi 4f<sub>7/2</sub> shifts from 159 eV to 159.8 eV after 5 days. This is a result of the conversion of Bi from an iodine octahedral environment to Bi<sub>2</sub>O<sub>3</sub>. After 14 days the Bi 4f<sub>7/2</sub> returns to 158.9 eV. This is because of the mixing of the oxide and iodide states of Bi to form BiOI.<sup>5</sup> Further, a distinct but broad shoulder appears at 161.7 eV (marked by arrows). As in the case of O 1s fine spectra, this peak is characteristic of a hydrated surface.<sup>6</sup>

## References:

1. A. Dualeh, P. Gao, S. I. Seok, M. K. Nazeeruddin and M. Grätzel, *Chemistry of Materials*, 2014, **26**, 6160-6164.
2. M. T. Vieyra-Eusebio and A. Rojas, *Journal of Chemical & Engineering Data*, 2011, **56**, 5008-5018.
3. I. Langmuir, *Physical review*, 1913, **2**, 329.
4. X.-j. Wang, F.-t. Li, D.-y. Li, R.-h. Liu and S.-j. Liu, *Materials Science and Engineering B-Advanced Functional Solid-State Materials*, 2015, **193**, 112-120.
5. H. Liu, W. R. Cao, Y. Su, Y. Wang and X. H. Wang, *Applied Catalysis B-Environmental*, 2012, **111**, 271-279.
6. J. Chastain, R. C. King and J. Moulder, *Handbook of X-ray photoelectron spectroscopy: a reference book of standard spectra for identification and interpretation of XPS data*, Physical Electronics Division, Perkin-Elmer Corporation Eden Prairie, Minnesota, 1992.
